# Supplementary material for: Two-electron transfer photoreduction of methyl viologen and perfluorooctanoic acid mediated by flavin mononucleotide at colloidal titanium dioxide interfaces
Source: Royal Society of Chemistry journal article supplement (doi:10.1039/d3nj04290a), 2023-01-01
Supplement: d3nj04290a1.pdf [file d3nj04290a1.pdf]

**Supporting Information:**

**Two-electron Transfer Photoreduction of Methyl Viologen and Perfluorooctanoic Acid Mediated by Flavin Mononucleotide at Colloidal Titanium Dioxide Interfaces.**

Tahseen S. Saeed<sup>a\*</sup>, Sarah S. Albalawi<sup>b</sup>, Abubkr Abuhagr<sup>a</sup>, Saja Abdulrahman Althobaiti<sup>a,c</sup>, Hawazen M. Hassanain<sup>b\*</sup>, Matt Reeves<sup>d</sup>, Mohammed R. Abdullah<sup>e</sup> and Ekkehard Sinn<sup>a</sup>

**Table of Contents**

|                                                                                                                                           |          |
|-------------------------------------------------------------------------------------------------------------------------------------------|----------|
| <b>Fig.S1.</b> Scanning electron microscopy (SEM) image of colloidal TiO <sub>2</sub> particles.....                                      | <b>2</b> |
| <b>Fig.S2.</b> UV-visible absorbance spectra of TiO <sub>2</sub> before and after photolysis.....                                         | <b>3</b> |
| <b>Fig.S3.</b> Mass spectrum of PFOA reduction by FMNH <sub>2</sub> /TiO <sub>2</sub> at negative mode before the reduction process. .... | <b>4</b> |
| <b>Fig.S4.</b> Mass spectrum of PFOA reduction by FMNH <sub>2</sub> /TiO <sub>2</sub> at negative mode after the reduction process. ....  | <b>5</b> |

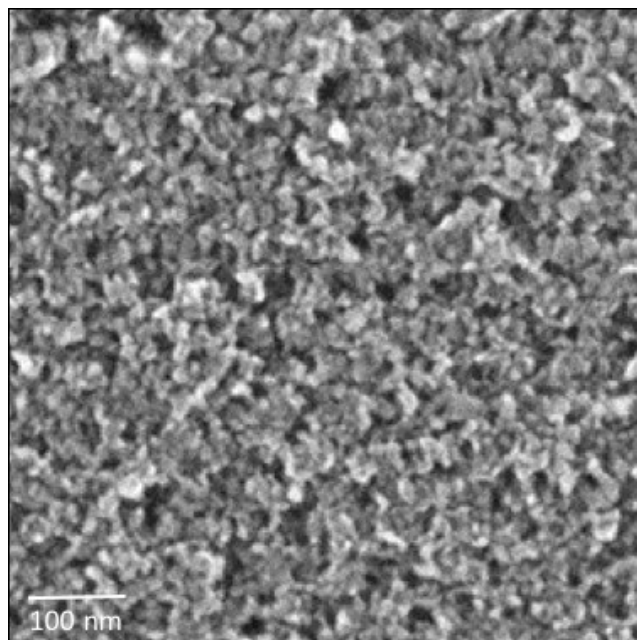

**Fig.S1.** Scanning electron microscopy (SEM) image of colloidal TiO<sub>2</sub> particles.

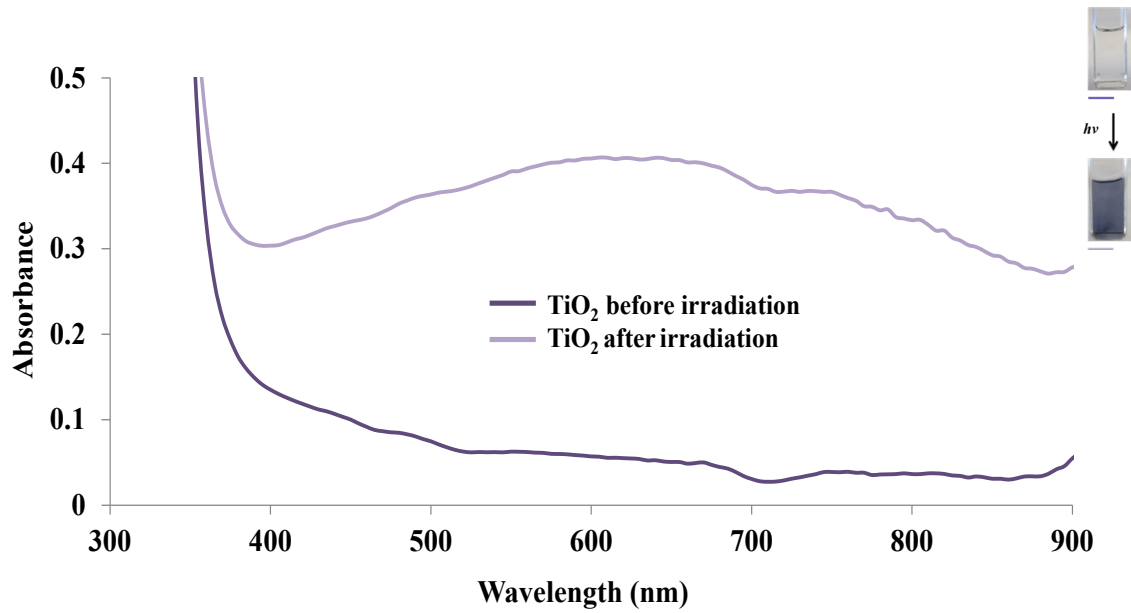

**Fig.S2.** UV-visible absorbance spectra of TiO<sub>2</sub> before and after photolysis.

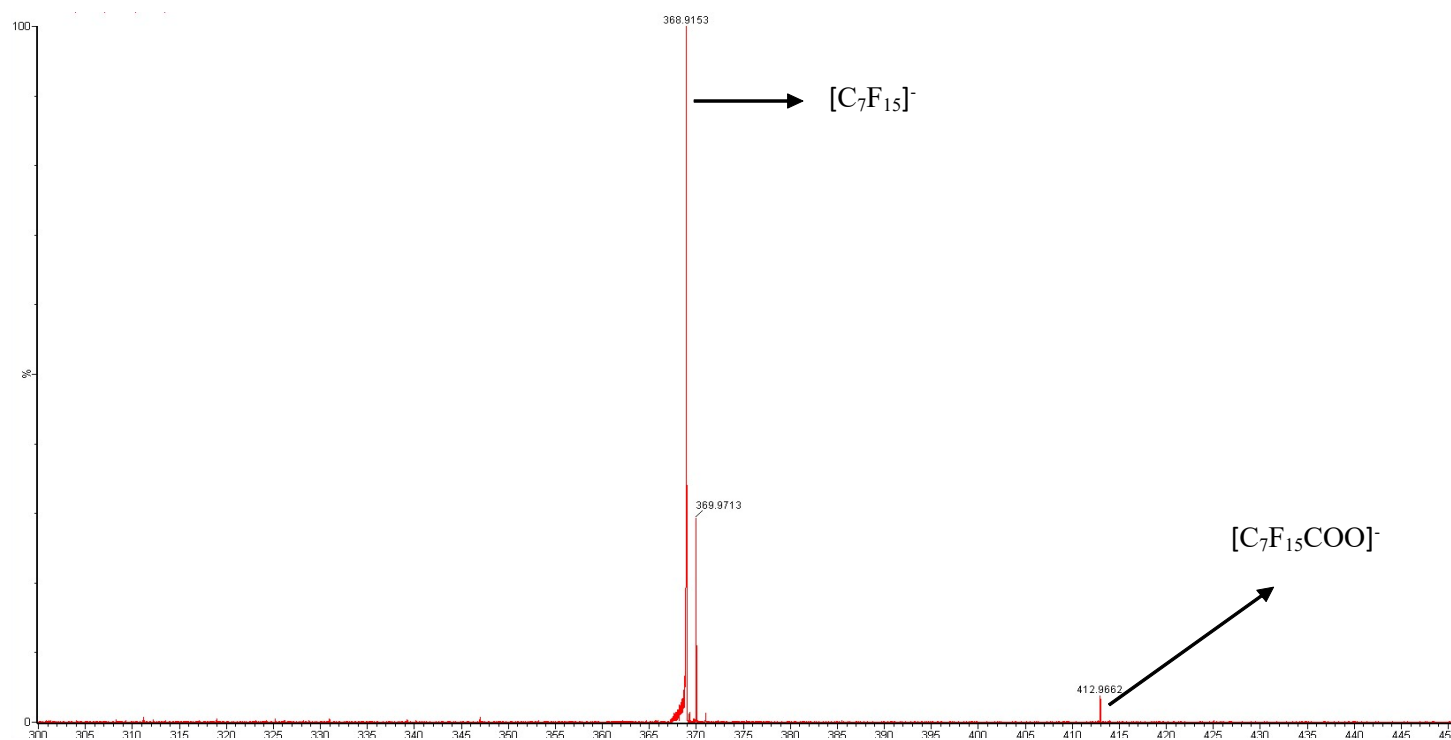

**Fig.S3.** Mass spectrum of PFOA reduction by  $FMNH_2/TiO_2$  at negative mode before the reduction process.

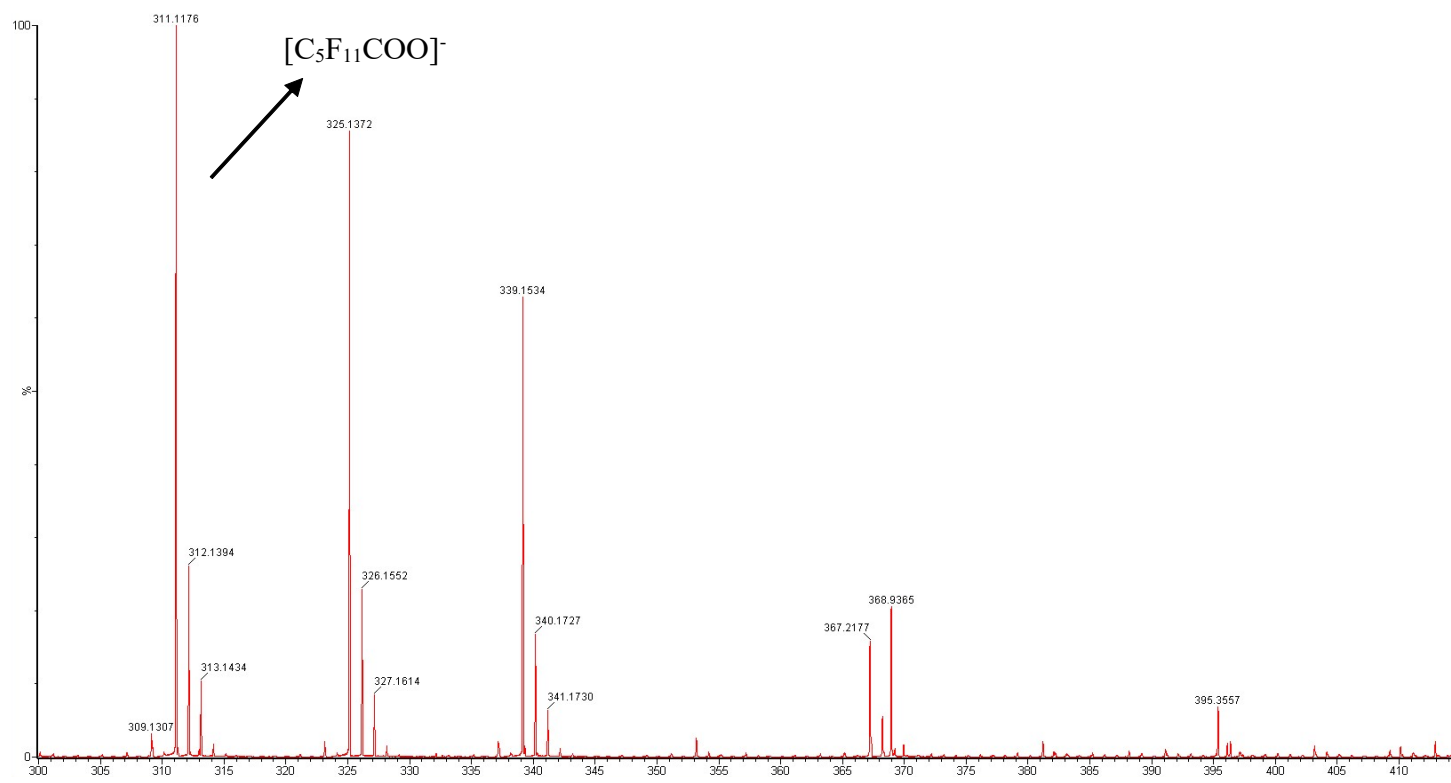

**Fig.S4.** Mass spectrum of PFOA reduction by  $FMNH_2/TiO_2$  at negative mode after the reduction process.
